# Supplementary material
Source: PubMed Central journal article supplement (PMC8206001)
Supplement: NIHMS1700236-supplement-009830_-_Supplemental_Material.pdf [file NIHMS1700236-supplement-009830_-_Supplemental_Material.pdf]

## Supplemental Material

### Supplemental Table I

|                                            | Correlation with FFR    |                |
|--------------------------------------------|-------------------------|----------------|
|                                            | Correlation coefficient | <i>P</i> value |
| MLD (mm)                                   | 0.23                    | 0.05           |
| MLA (mm <sup>2</sup> )                     | 0.32                    | 0.01           |
| Area stenosis (%)                          | -0.21                   | 0.07           |
| MLA/BSA (mm <sup>2</sup> /m <sup>2</sup> ) | 0.32                    | 0.01           |

Abbreviations: IVUS: Intravascular ultrasound, iFR: instantaneous wave free ratio, MLD: Minimum Lumen Diameter, MLA: Minimum Lumen Area, BSA: Body Surface Area
